# Supplementary material
Source: PubMed Central journal article supplement (PMC2681413)

**A**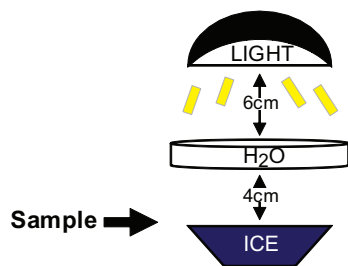**B**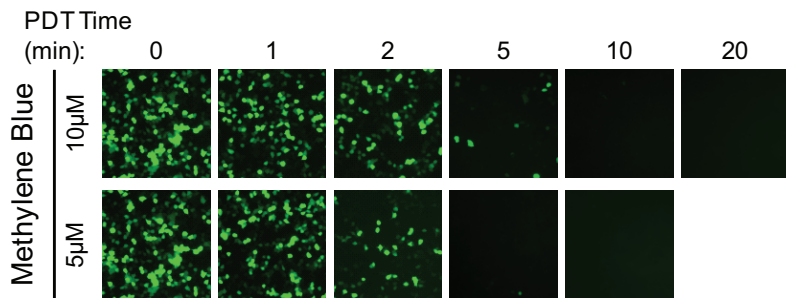**C**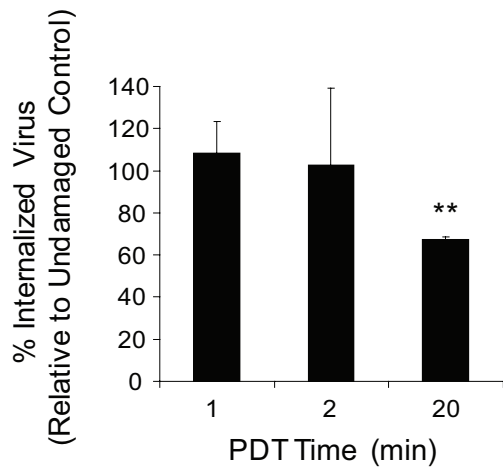

Supplement: NIHMS108953-supplement-Supp_Fig_1.pdf [file NIHMS108953-supplement-Supp_Fig_1.pdf]
